# Supplementary material for: Genomic Constellation of Human Rotavirus G8 Strains in Brazil over a 13-Year Period: Detection of the Novel Bovine-like G8P[8] Strains with the DS-1-like Backbone
Source: MDPI journal article supplement (doi:10.3390/v15030664), 2023-03-01
Supplement: s1 [file s1]

**Supplement S1.** Length and nucleotide position of each gene segment of the human rotavirus G8 strains detected in Brazil, 2007-2020.

|              |           |                 |                   | IAL-R193 G8P[8] |               | IAL-R558 G8P[8] |               | IAL-R2601 G8P[4] |               | IAL-R2600 G8P[4] |               | IAL-R2598 G8P[4] |               | IAL-R2597 G8P[4] |               | IAL-R2437 G8P[6] |               | IAL-R2404 G8P[6] |               | IAL-RN377 G8P[6] |               | IAL-RN374 G8P[6] |               | IAL-RN373 G8P[6] |               | IAL-RN361 G8P[6] |               |
|--------------|-----------|-----------------|-------------------|-----------------|---------------|-----------------|---------------|------------------|---------------|------------------|---------------|------------------|---------------|------------------|---------------|------------------|---------------|------------------|---------------|------------------|---------------|------------------|---------------|------------------|---------------|------------------|---------------|
| Gene segment | Size (nt) | Encoded protein | ORF position (nt) | Size (nt)       | Position (nt) | Size (nt)       | Position (nt) | Size (nt)        | Position (nt) | Size (nt)        | Position (nt) | Size (nt)        | Position (nt) | Size (nt)        | Position (nt) | Size (nt)        | Position (nt) | Size (nt)        | Position (nt) | Size (nt)        | Position (nt) | Size (nt)        | Position (nt) | Size (nt)        | Position (nt) | Size (nt)        | Position (nt) |
| 1            | 3,302     | VP1             | 19-3,285          | 677             | 1-676         | 648             | 1-645         | 663              | 16-678        | 606              | 16-621        | 598              | 16-613        | 620              | 16-635        | 604              | 8-611         | 606              | 8-613         | 606              | 8-613         | 605              | 8-612         | 671              | 8-678         | 606              | 8-613         |
| 2            | 2,690     | VP2             | 17-2,656          | 648             | 2-649         | 653             | 1-653         | 610              | 51-660        | 608              | 53-660        | 595              | 66-660        | 600              | 61-660        | 649              | 12-660        | 649              | 12-660        | 649              | 12-660        | 648              | 13-660        | 648              | 13-660        | 648              | 13-660        |
| 3            | 2,591     | VP3             | 50-2,557          | 697             | 6-702         | 652             | 2-653         | 629              | 50-678        | 629              | 50-678        | 612              | 50-661        | 629              | 50-678        | 643              | 45-687        | 609              | 45-653        | 639              | 45-683        | 634              | 45-678        | 634              | 45-678        | 524              | 456-979       |
| 4            | 2,362     | VP4             | 10-2,337          | 771             | 64-834        | 767             | 73-839        | 756              | 73-828        | 781              | 56-836        | 747              | 77-823        | 750              | 75-824        | 753              | 78-830        | 763              | 73-835        | 766              | 77-842        | 731              | 104-834       | 766              | 78-843        | 759              | 71-829        |
| 5            | 1,611     | NSP1            | 11-1,492          | 770             | 612-1381      | 1451            | 62-1512       | 1512             | 10-1521       | 956              | 573-1528      | 928              | 582-1509      | 811              | 586-1396      | 947              | 575-1521      | 797              | 576-1372      | 994              | 573-1566      | 794              | 576-1369      | 770              | 572-1341      | 881              | 636-1516      |
| 6            | 1,356     | VP6             | 24-1,217          | 1270            | 15-1284       | 1306            | 35-1340       | 1250             | 35-1284       | 1292             | 35-1326       | 1203             | 90-1292       | 1241             | 60-1300       | 1297             | 35-1328       | 1281             | 42-1322       | 1290             | 38-1327       | 1294             | 35-1328       | 1285             | 36-1320       | 1094             | 119-1212      |
| 7            | 1,104     | NSP3            | 16-948            | 472             | 144-615       | 886             | 125-110       | 804              | 202-1005      | 765              | 221-985       | 804              | 202-1005      | 962              | 43-1004       | 938              | 40-977        | 918              | 60-977        | 960              | 47-1006       | 966              | 43-1008       | 967              | 40-1006       | 914              | 68-979        |
| 8            | 1,059     | NSP2            | 30-983            | 429             | 257-685       | 683             | 328-1010      | 779              | 83-861        | 940              | 57-996        | 782              | 66-847        | 954              | 62-1015       | 923              | 79-1001       | 916              | 83-998        | 837              | 53-889        | 588              | 415-1002      | 930              | 61-988        | 863              | 124-986       |
| 9            | 1,062     | VP7             | 49-1,029          | 914             | 75-988        | 711             | 1-711         | 879              | 55-933        | 449              | 106-554       | 930              | 65-994        | 925              | 29-953        | 925              | 29-953        | 801              | 194-994       | 944              | 58-1001       | 773              | 226-998       | 937              | 58-994        | 725              | 279-1003      |
| 10           | 751       | NSP4            | 42-569            | 663             | 49-711        | 666             | 47-712        | 613              | 59-671        | 664              | 45-708        | 663              | 46-708        | 661              | 42-702        | 706              | 2-707         | 666              | 46-711        | 630              | 47-676        | 602              | 45-646        | 637              | 38-674        | 582              | 59-640        |
| 11           | 667       | NSP5/6          | 5-598             | 612             | 1-612         | 667             | 1-667         | 667              | 1-667         | 667              | 1-667         | 667              | 1-667         | 667              | 1-667         | 667              | 1-667         | 667              | 1-667         | 667              | 1-667         | 667              | 1-667         | 667              | 1-667         | 667              | 1-667         |
| Total genome | 18,474    | -               | -                 | 7,923           | -             | 9,090           | -             | 9,192            | -             | 8,357            | -             | 8,529            | -             | 8,820            | -             | 9,052            | -             | 8,673            | -             | 8,982            | -             | 8,302            | -             | 8,912            | -             | 8,263            | -             |

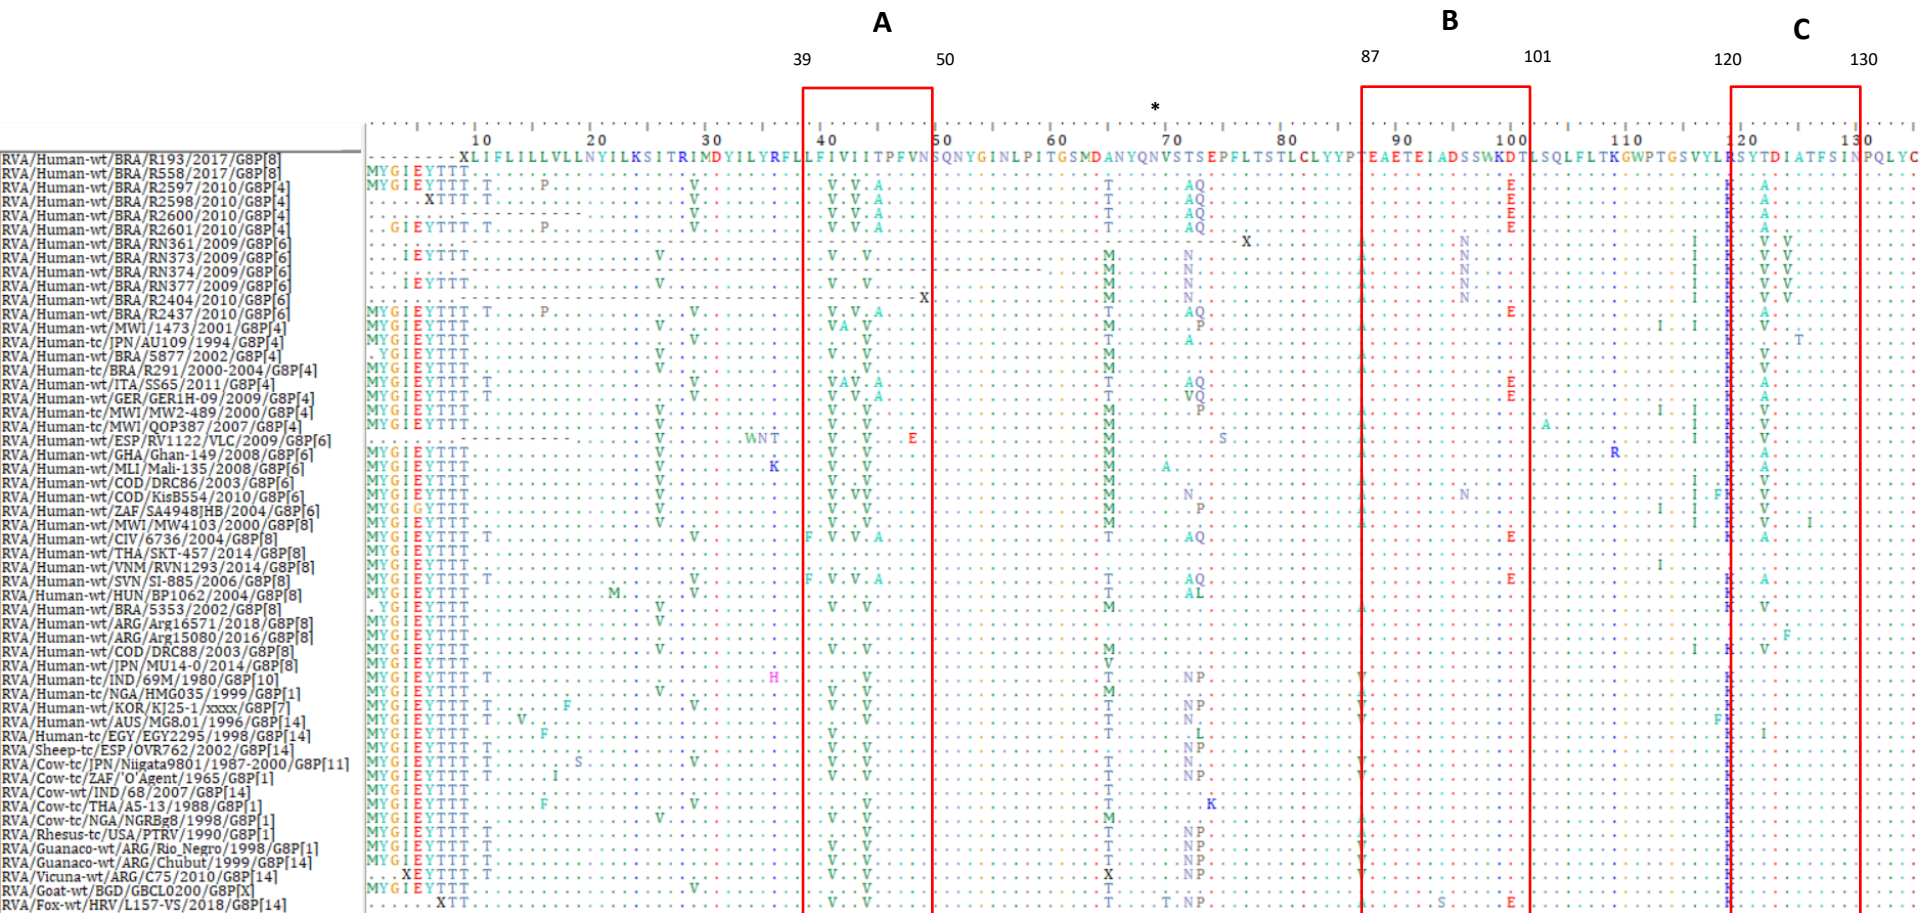

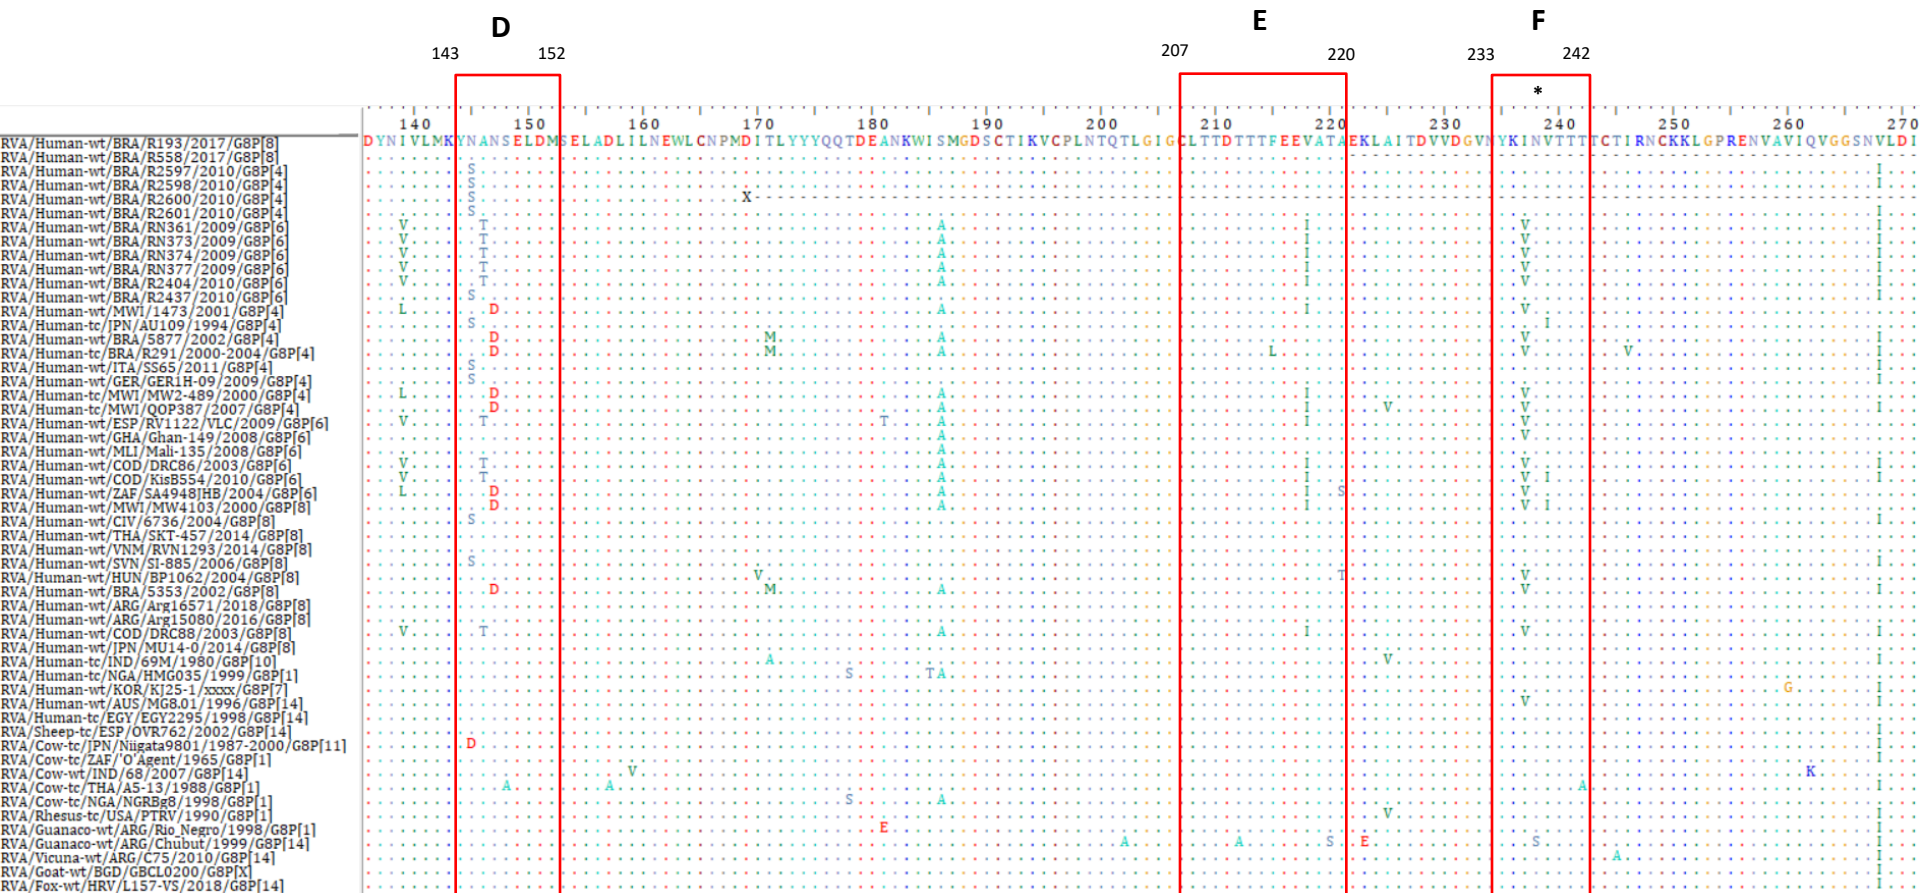

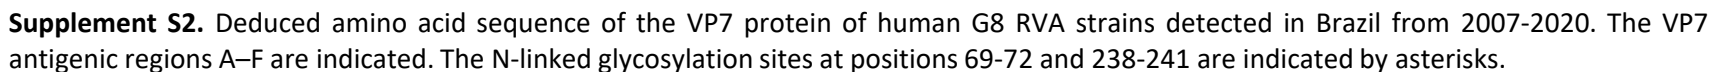

## Hypervariable region

71

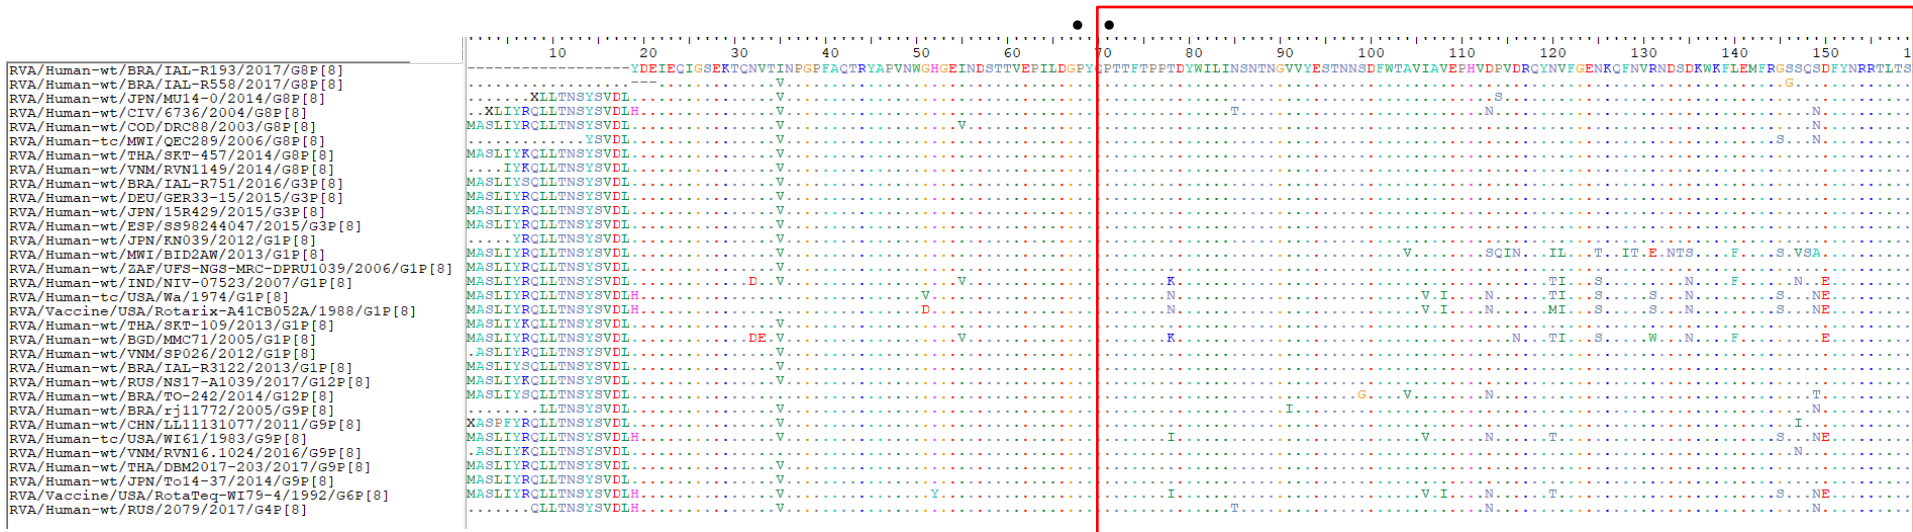



## Hypervariable region

204

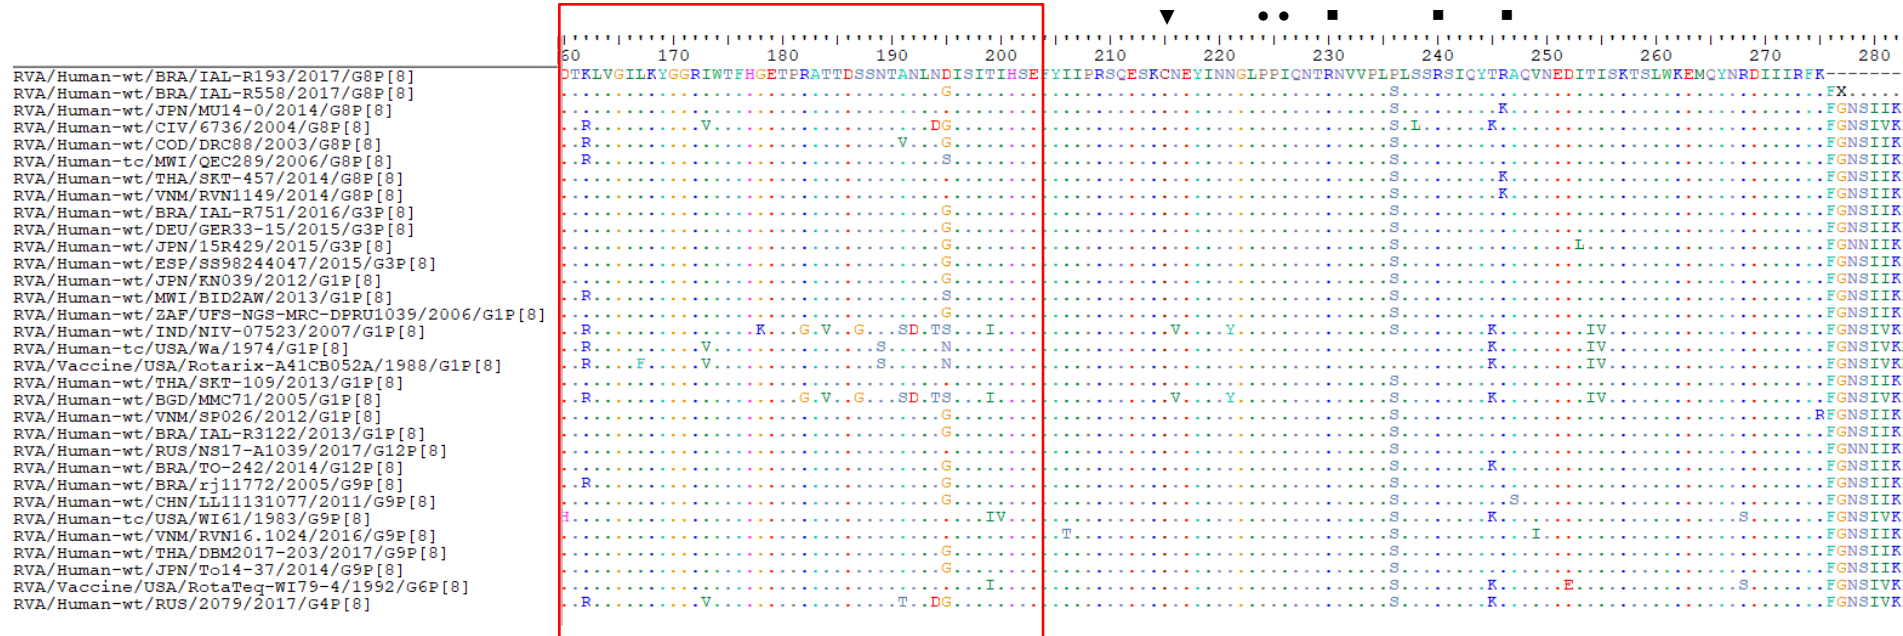

**Supplement S3.** Deduced amino acid sequence of the VP8\* trypsin cleavage product of the VP4 protein of the human rotavirus G8P[8] strains detected in Brazil, 2007-2020, and of a selection of P[8] rotaviruses. The hypervariable region (aa 71–204), and the highly conserved cysteine (▼), proline (●) and arginine (■) are indicated.

# Hypervariable region

71

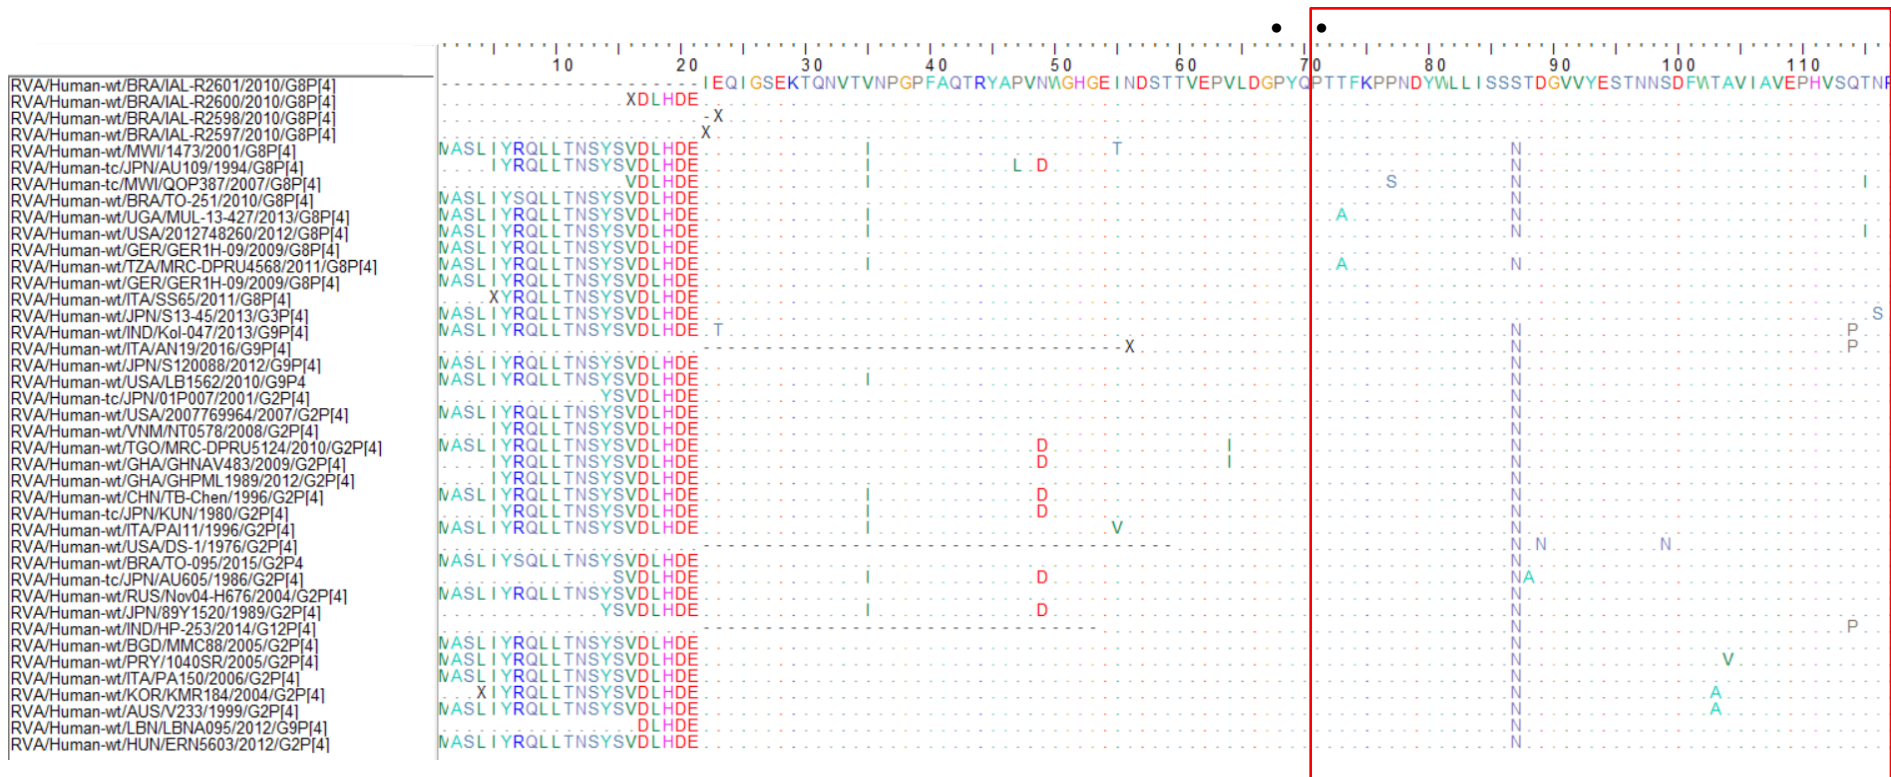

## Hypervariable region

204

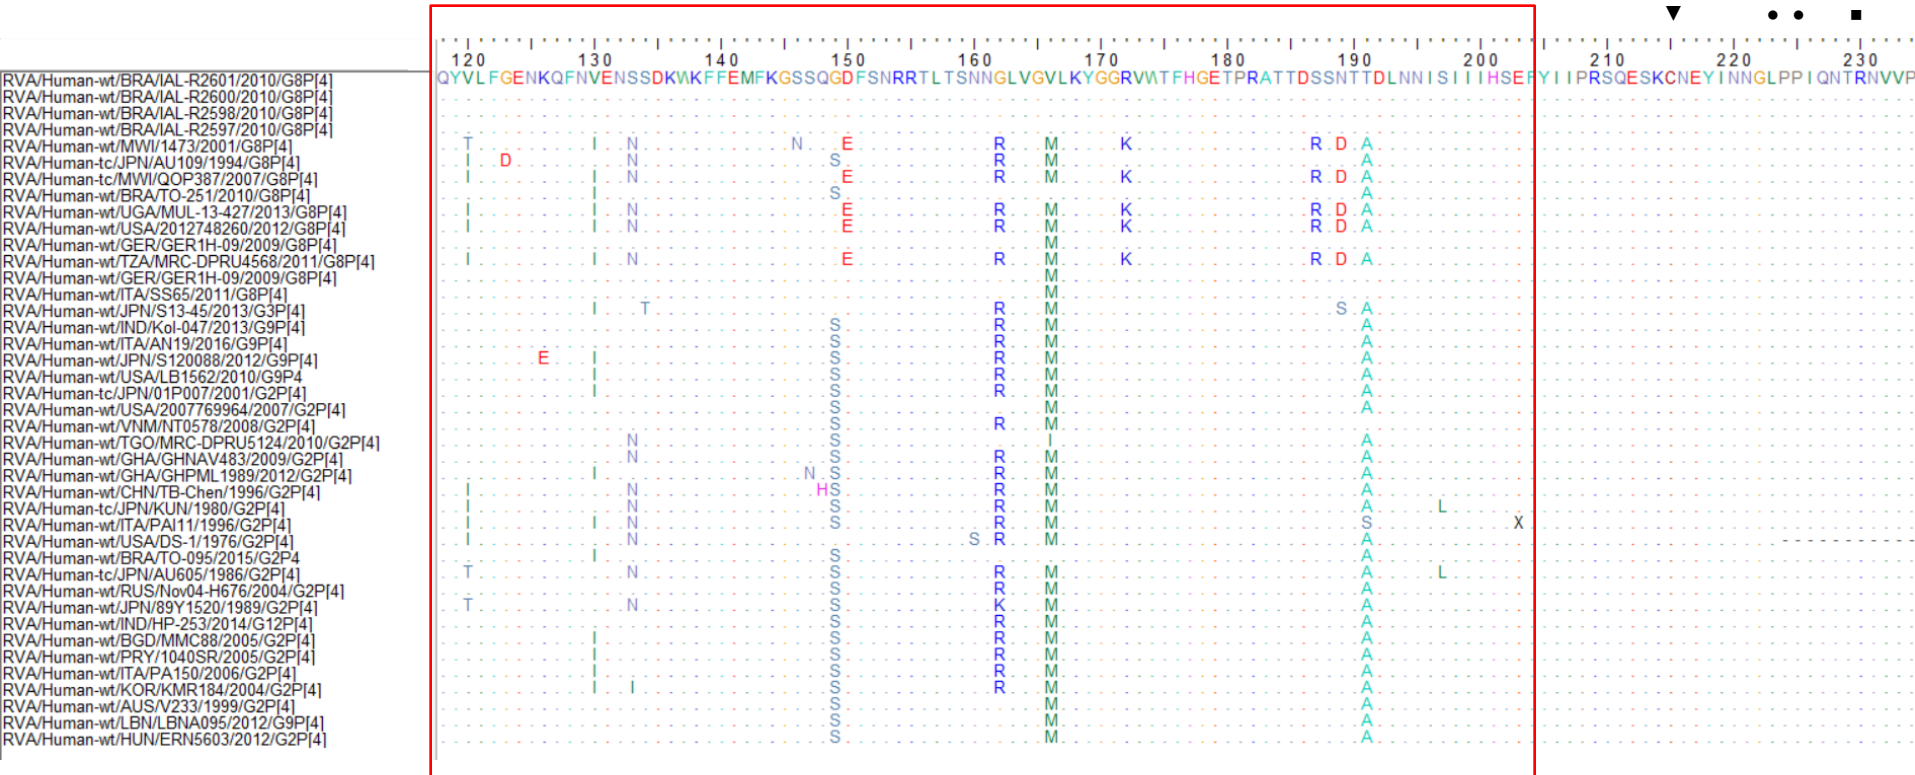



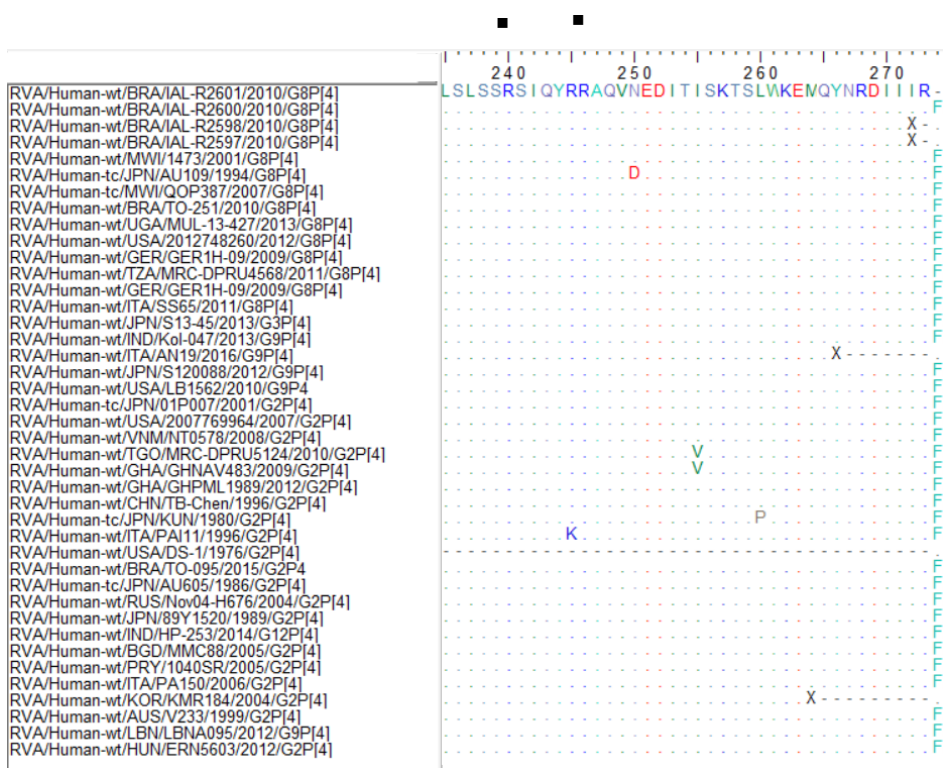

**Supplement S4.** Deduced amino acid sequence of the VP8\* trypsin cleavage product of the VP4 protein of the human rotavirus G8P[4] strains detected in Brazil, 2007–2020, and of a selection of P[4] rotaviruses. The hypervariable region (aa 71–204), and the highly conserved cysteine (▼), proline (●) and arginine (■) are indicated.

# Hypervariable region

71

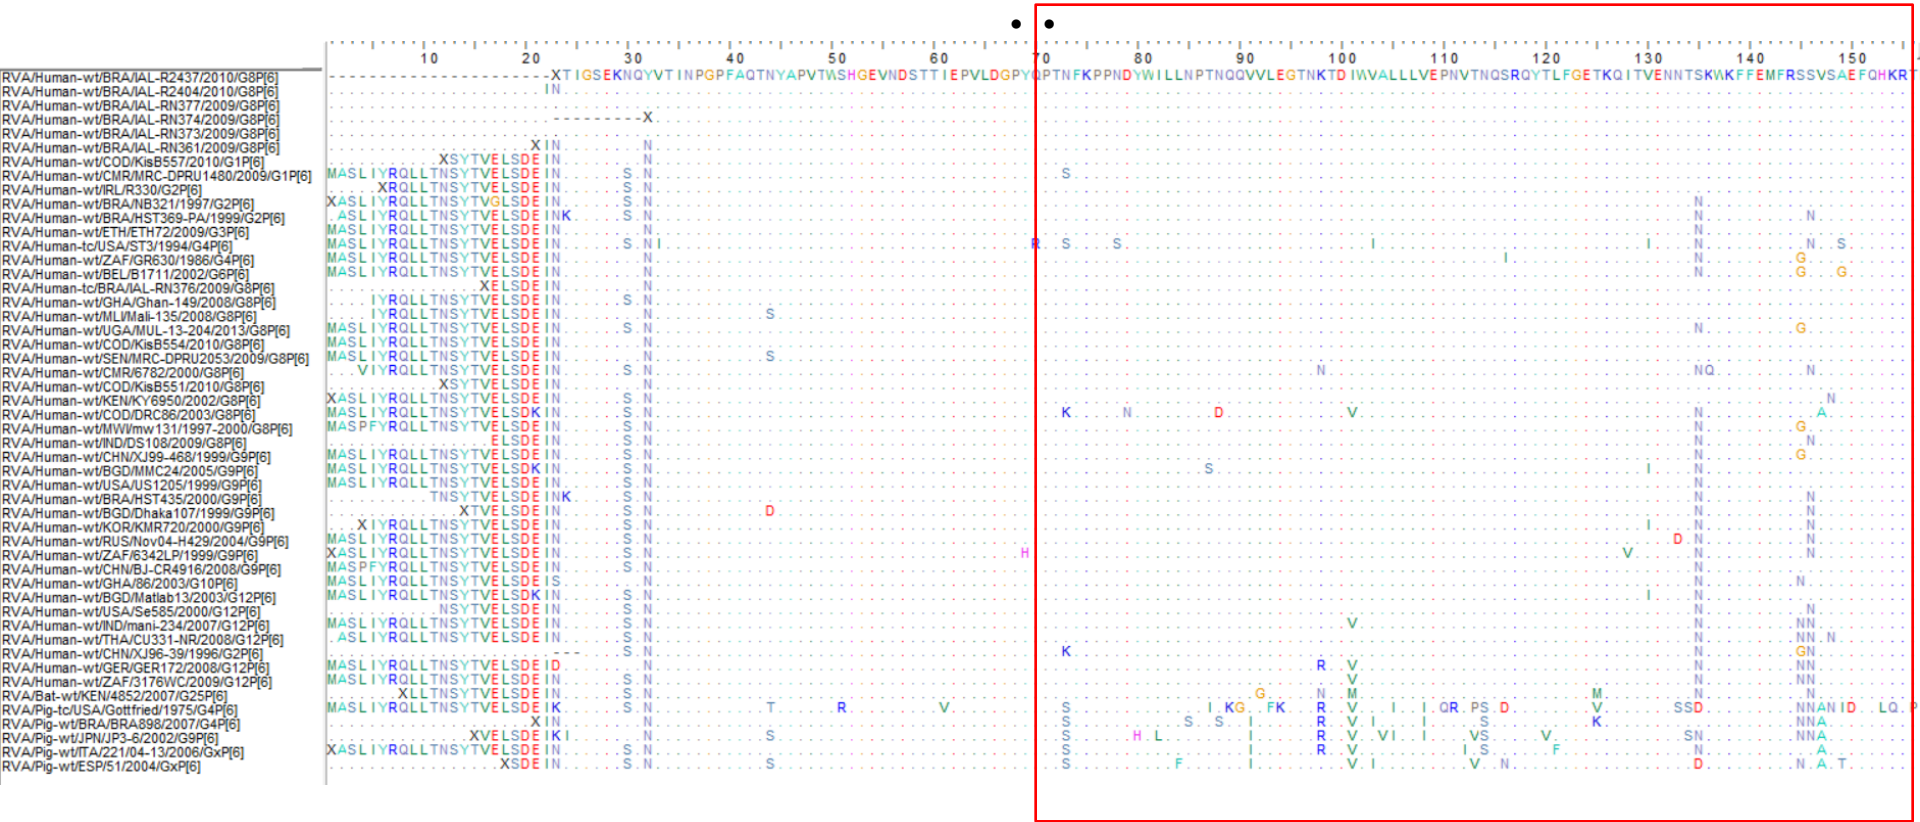

## Hypervariable region

204

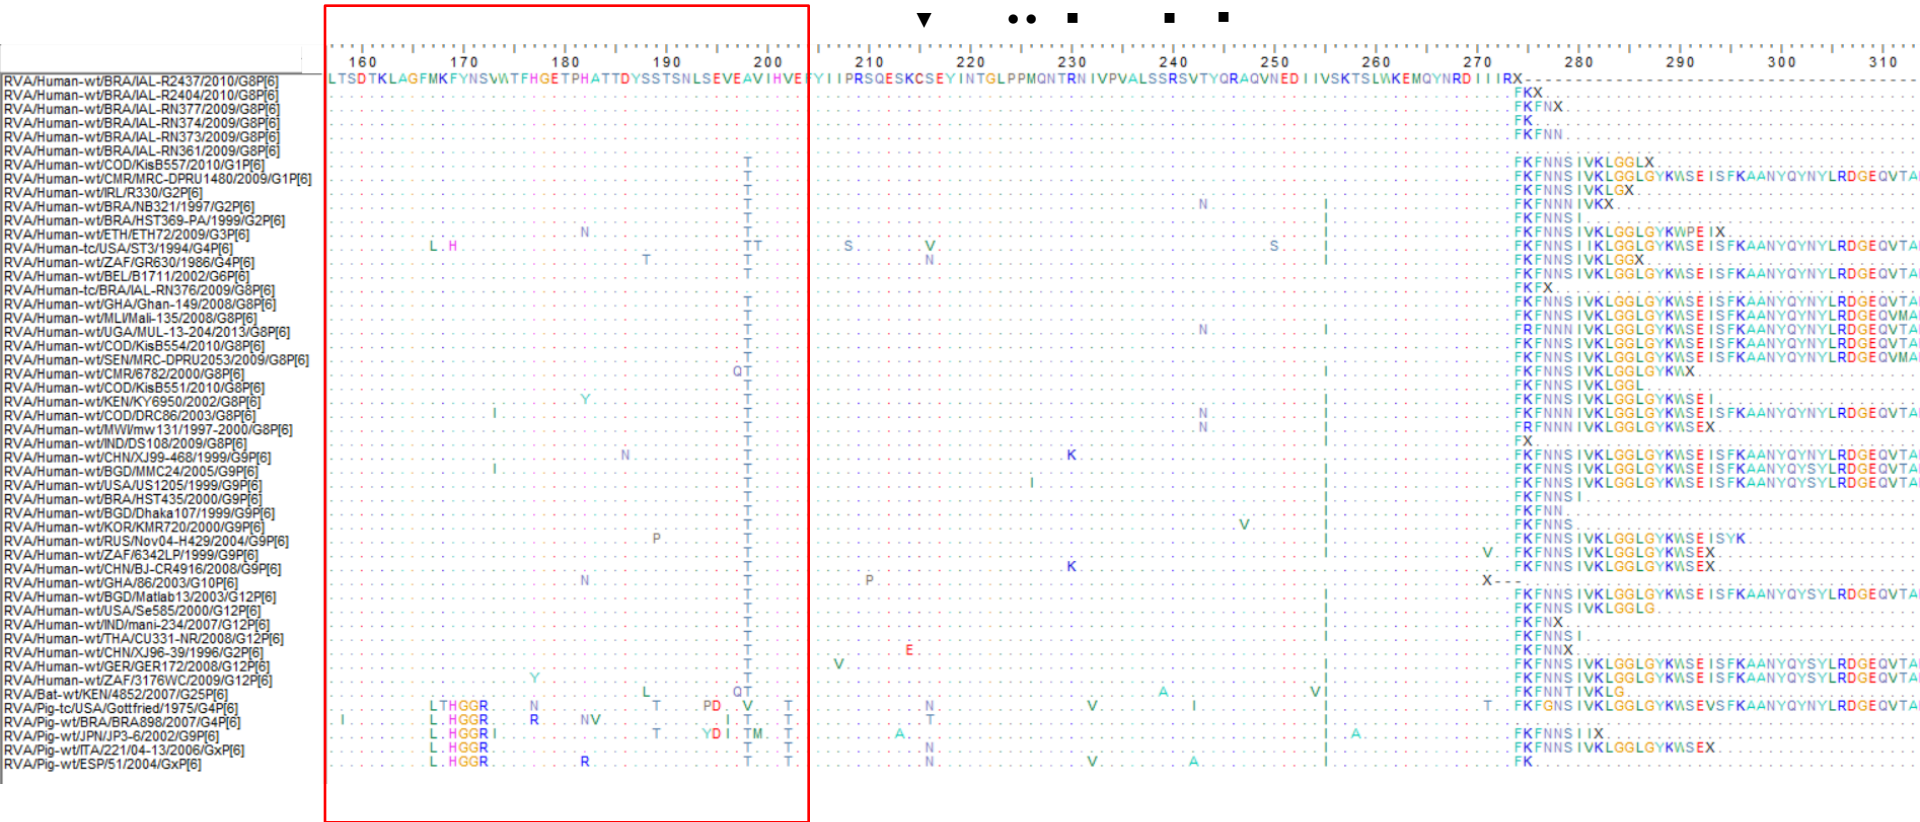

**Supplement S5.** Deduced amino acid sequence of the VP8\* trypsin cleavage product of the VP4 protein of the human rotavirus G8P[6] strains detected in Brazil, 2007-2020, and of a selection of P[6] rotaviruses. The hypervariable region (aa 71–204), and the highly conserved cysteine (▼), proline (●) and arginine (■) are indicated.

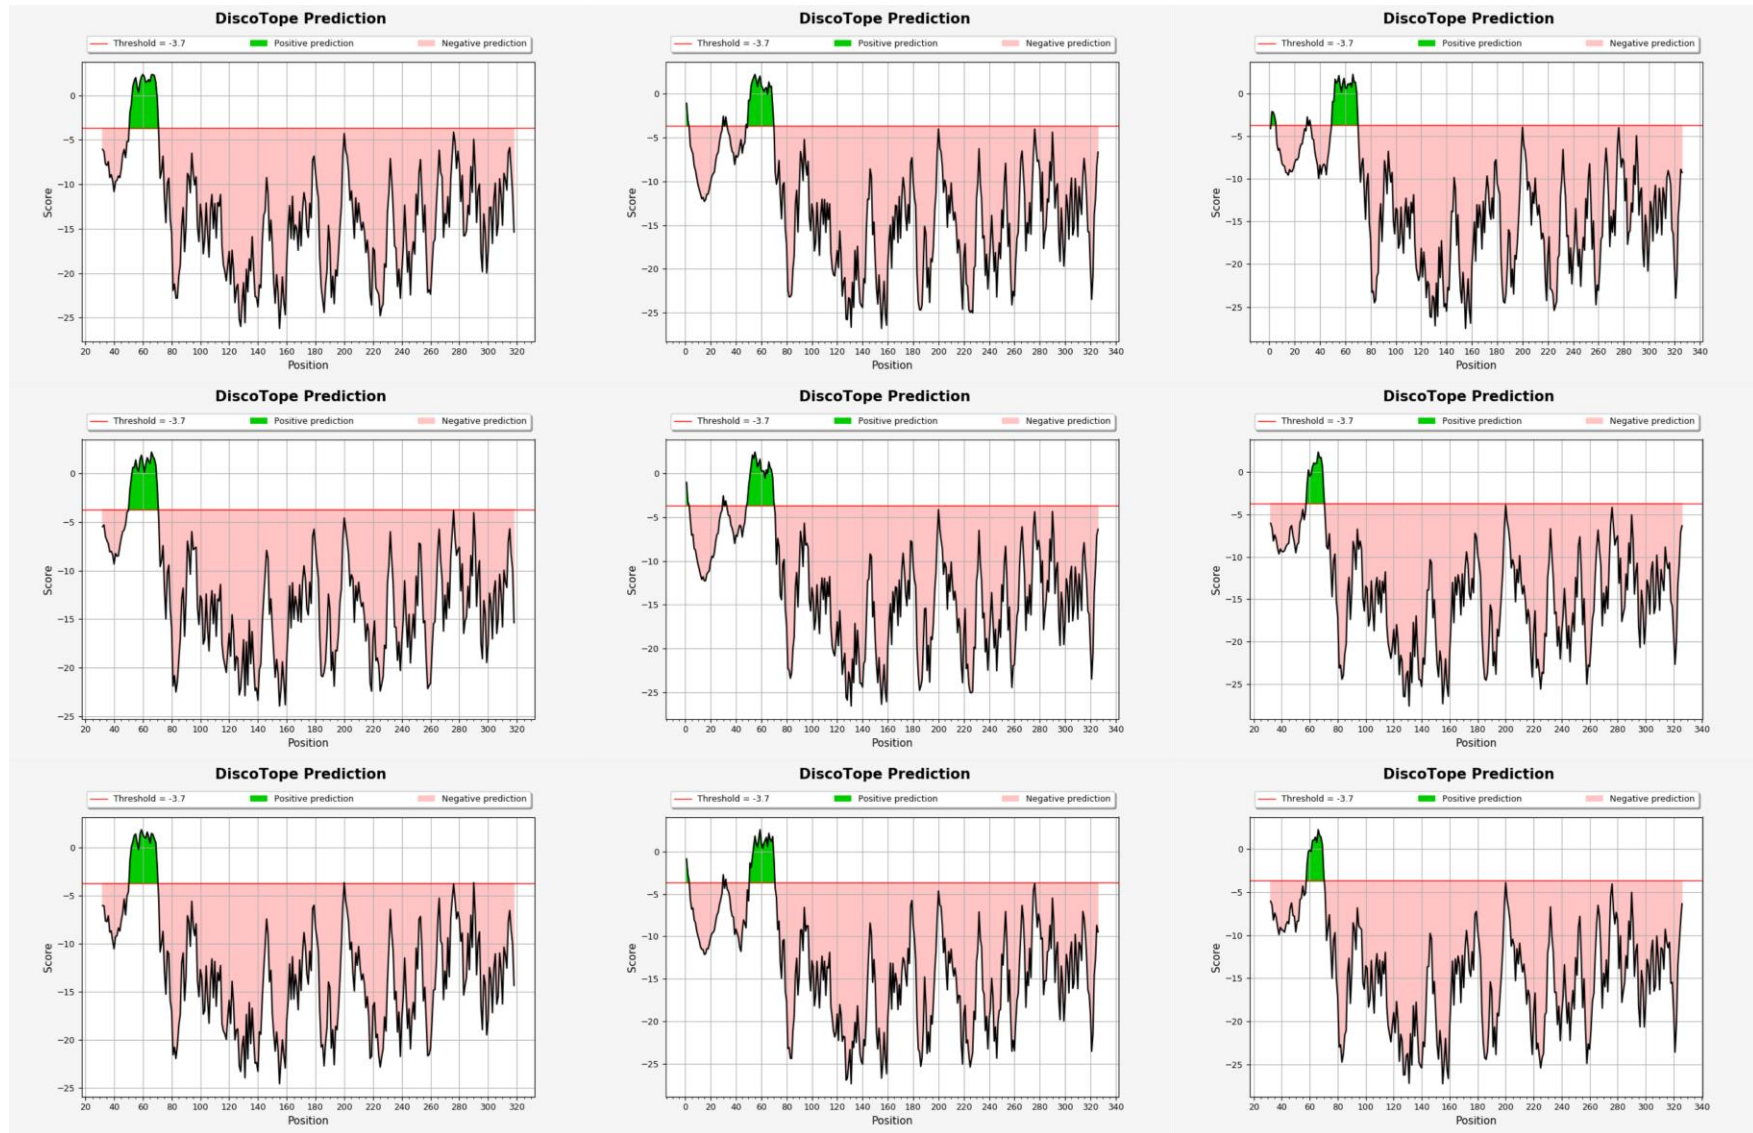

**Supplement S6.** Conformational B Cell Epitope predictions. Modeled structures were inspected individually for elucidation of potential discontinuous epitopes using IEDB website (<https://www.iedb.org/>).
